# Supplementary material for: Genome-Destabilizing Effects Associated with Top1 Loss or Accumulation of Top1 Cleavage Complexes in Yeast
Source: PubMed Central journal article supplement (PMC4382028; doi:10.1371/journal.pgen.1005098), 2015-04-01
Supplement: pgen.1005098.s003.pdf [file pgen.1005098.s003.pdf]

S2 Table. Conversion tracts associated with reciprocal crossovers in *top1Δ* red/white sectors

| Class | Number observed | Description                                             |
|-------|-----------------|---------------------------------------------------------|
| A     | 10              | Simple crossover, no conversion tract                   |
|       |                 |                                                         |
| B     | 23              | 3:1 conversion tract                                    |
| B1**  | 11              |                                                         |
| B2**  | 12              |                                                         |
| C     | 2               | 4:0 conversion tract                                    |
| C2*   | 2               |                                                         |
| D     | 12              | Simple hybrid conversion tract (4:0/3:1 or 3:1/4:0/3:1) |
| D1*   | 1               |                                                         |
| D2*   | 1               |                                                         |
| D3*   | 1               |                                                         |
| D4*   | 1               |                                                         |
| D5*   | 3               |                                                         |
| D6*   | 5               |                                                         |
| E     | 5               | Complex conversion tracts                               |
| E2**  | 1               |                                                         |
| E3*   | 1               |                                                         |
| E5*   | 1               |                                                         |
| E11*  | 1               |                                                         |
| E26*  | 1               |                                                         |

Novel 36

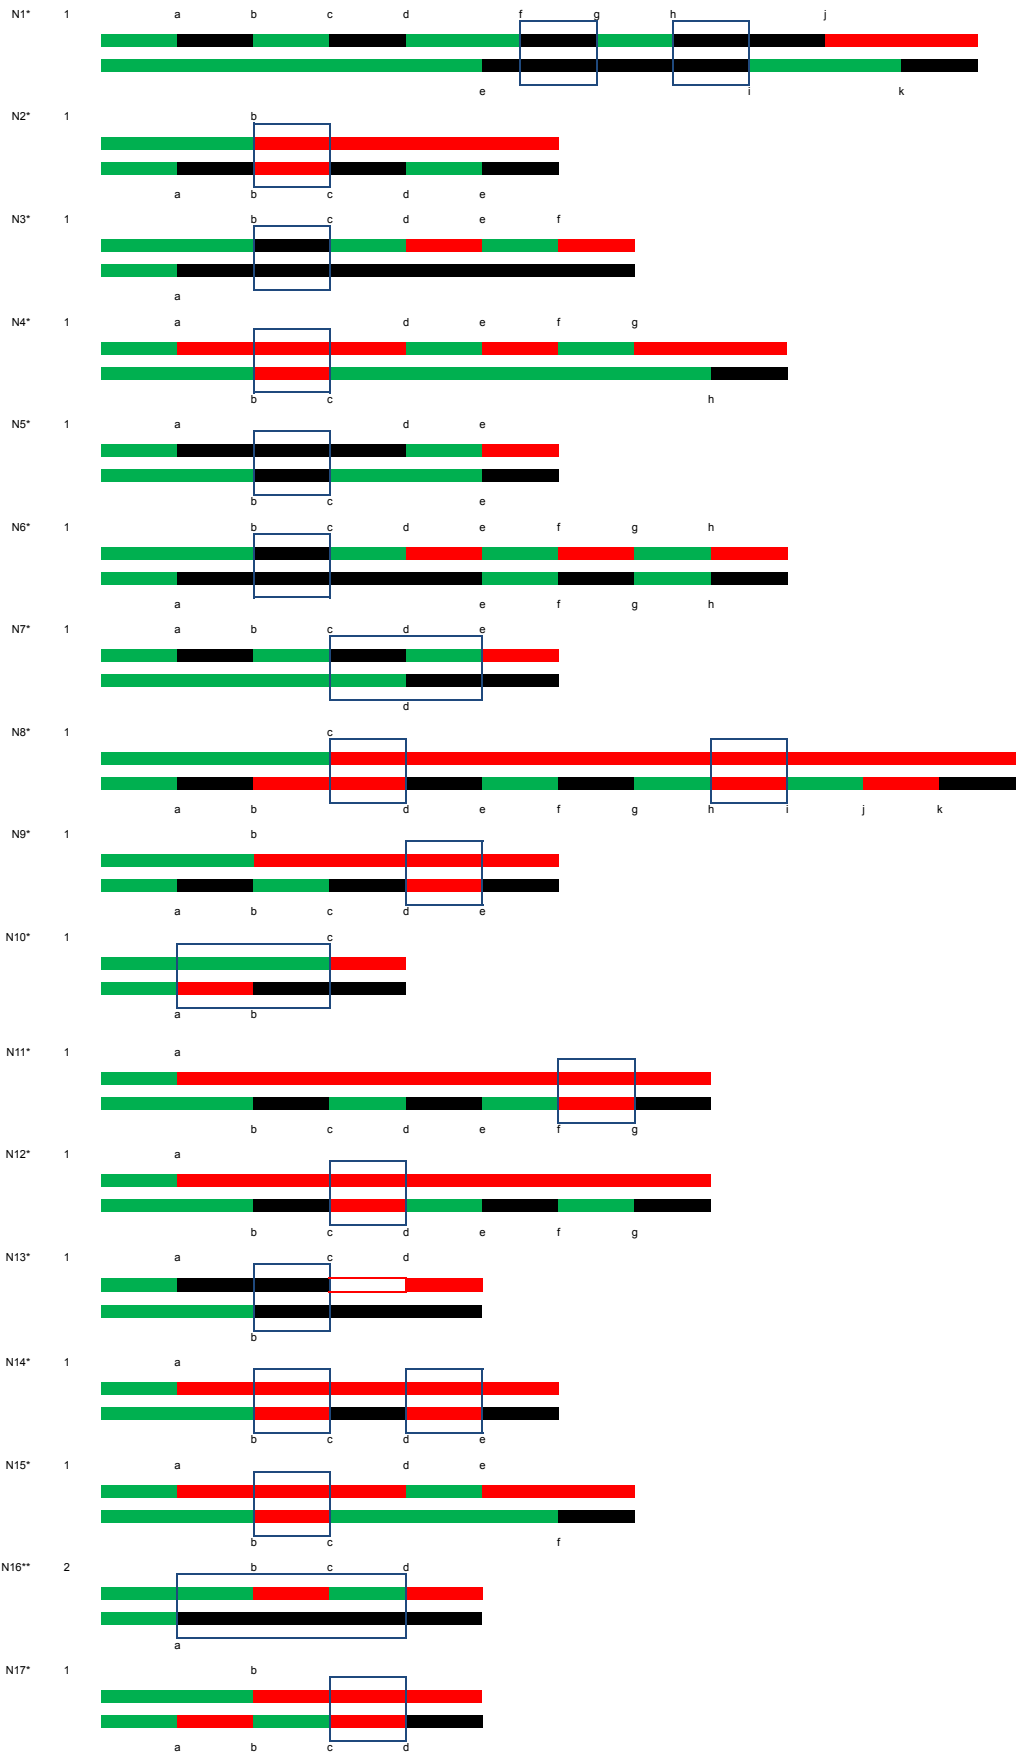

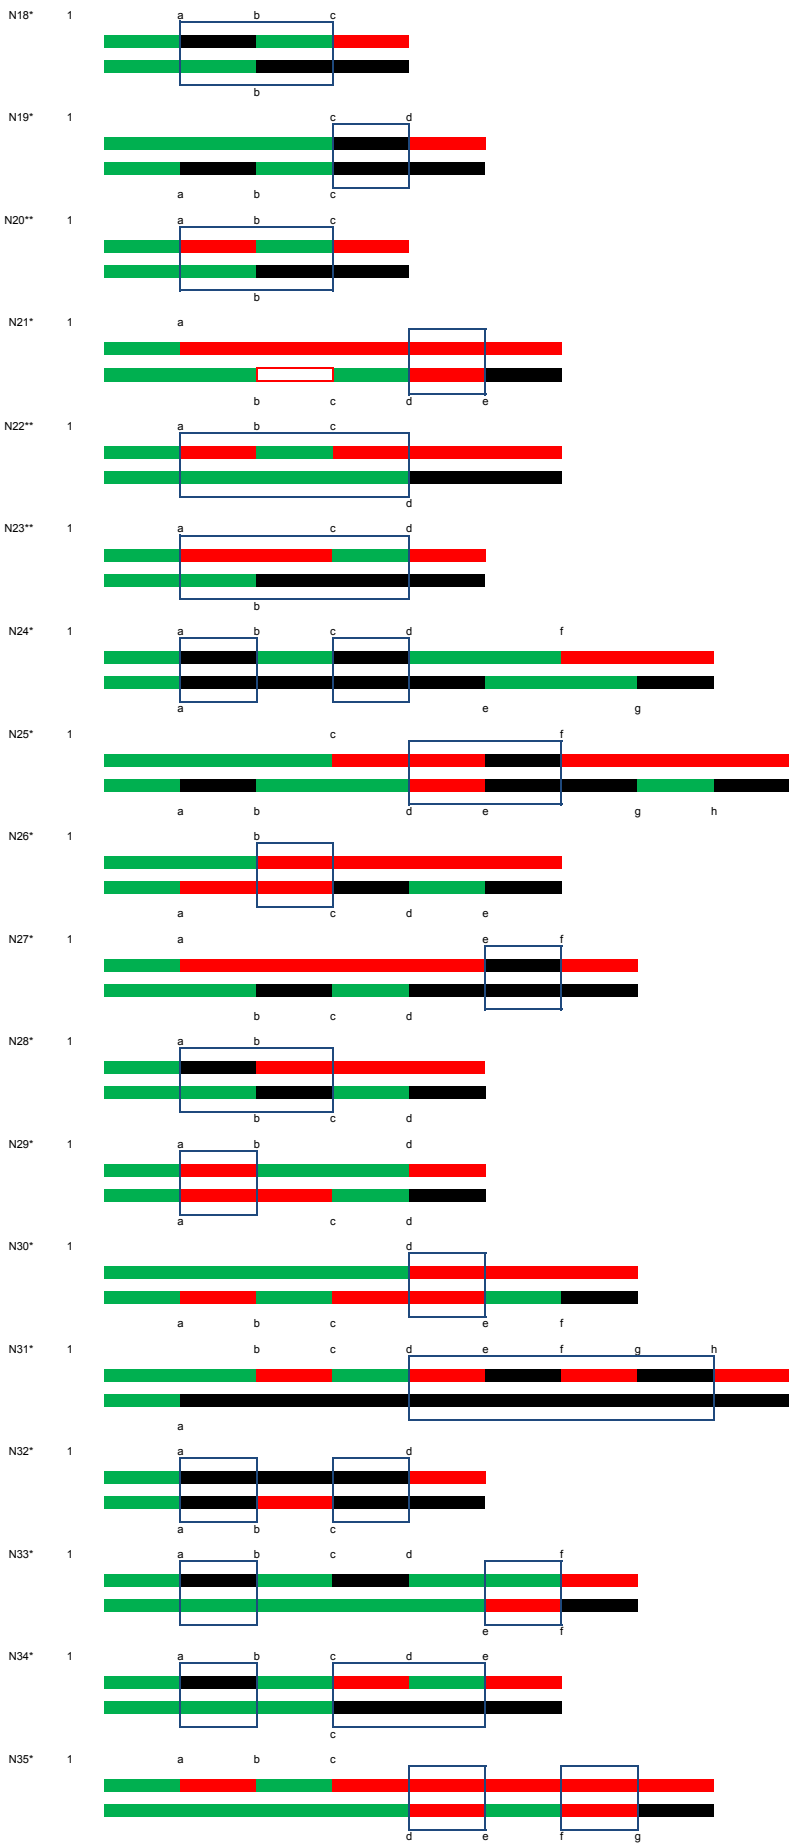

\*G1-initiated DSB

\*\* G2-initiated DSB

Green, red and black represent heterozygosity for SNPs, homozygosity for W303-1A SNPs, and homozygosity for YJM789 SNPs, respectively.
