# Supplementary material for: Genome-Destabilizing Effects Associated with Top1 Loss or Accumulation of Top1 Cleavage Complexes in Yeast
Source: PubMed Central journal article supplement (PMC4382028; doi:10.1371/journal.pgen.1005098), 2015-04-01
Supplement: pgen.1005098.s005.pdf [file pgen.1005098.s005.pdf]

**S4 Table. Conversion tracts associated with reciprocal crossovers in CPT-treated red/white sectors.**

| Class        | Number observed |                                                                |
|--------------|-----------------|----------------------------------------------------------------|
| <b>A</b>     | <b>5</b>        | <b>Simple crossover, no conversion tract</b>                   |
|              |                 |                                                                |
| <b>B</b>     | <b>9</b>        | <b>3:1 conversion tract</b>                                    |
| B1**         | 4               |                                                                |
| B2**         | 5               |                                                                |
| <b>D</b>     | <b>1</b>        | <b>Simple hybrid conversion tract (4:0/3:1 or 3:1/4:0/3:1)</b> |
| D6*          | 1               |                                                                |
| <b>Novel</b> | <b>5</b>        |                                                                |
| N20**        | 1               |                                                                |
| N36*         | 1               |                                                                |
| N37**        | 1               |                                                                |
| N38**        | 1               |                                                                |
| N39**        | 1               |                                                                |

\*G1-initiated DSB

\*\* G2-initiated DSB

Green, red and black represent heterozygosity for SNPs, homozygosity for W303-1A SNPs, and homozygosity for YJM789 SNPs, respectively.
