# Supplementary material for: Genome-Destabilizing Effects Associated with Top1 Loss or Accumulation of Top1 Cleavage Complexes in Yeast
Source: PubMed Central journal article supplement (PMC4382028; doi:10.1371/journal.pgen.1005098), 2015-04-01
Supplement: pgen.1005098.s007.pdf [file pgen.1005098.s007.pdf]

**S6 Table. Conversion tracts associated with reciprocal crossovers in Top1-T722A red/white sectors.**

| Class | Number observed |                                                         |
|-------|-----------------|---------------------------------------------------------|
| A     | 5               | Simple crossover, no conversion tract                   |
|       |                 |                                                         |
| B     | 12              | 3:1 conversion tract                                    |
| B1**  | 8               |                                                         |
| B2**  | 4               |                                                         |
| D     | 2               | Simple hybrid conversion tract (4:0/3:1 or 3:1/4:0/3:1) |
| D5*   | 1               |                                                         |
| D6*   | 1               |                                                         |
| Novel | 1               |                                                         |
| N40** |                 |                                                         |

\*G1-initiated DSB

\*\* G2-initiated DSB

Green, red and black represent heterozygosity for SNPs, homozygosity for W303-1A SNPs, and homozygosity for YJM789 SNPs, respectively.
