# Supplementary material for: Genome-Destabilizing Effects Associated with Top1 Loss or Accumulation of Top1 Cleavage Complexes in Yeast
Source: PubMed Central journal article supplement (PMC4382028; doi:10.1371/journal.pgen.1005098), 2015-04-01
Supplement: pgen.1005098.s009.pdf [file pgen.1005098.s009.pdf]

**S8 Table. Chromosome depictions for events detected in clones sub-cultured 10 times.**

| Strain   | Genotype | Condition                                       | Event Class | Number observed |                                                              |
|----------|----------|-------------------------------------------------|-------------|-----------------|--------------------------------------------------------------|
| JSC25    | WT       | YPD + DMSO                                      | a           | 1               | Terminal LOH                                                 |
|          |          |                                                 | a1          | 1               |                                                              |
|          |          |                                                 | b           | 1               | Gene Conversions                                             |
|          |          |                                                 | b1          | 1               |                                                              |
|          |          |                                                 | a           | 4               | Terminal LOH                                                 |
|          |          | YPD + CPT                                       | a1          | 1               |                                                              |
|          |          |                                                 | a2          | 2               |                                                              |
|          |          |                                                 | a3          | 1               |                                                              |
|          |          |                                                 | b           | 3               | Gene Conversions                                             |
|          |          |                                                 | b2          | 3               |                                                              |
| d        | 1        | Terminal LOH at the rDNA locus (Chromosome XII) |             |                 |                                                              |
| d1       | 1        |                                                 |             |                 |                                                              |
| SLA46.D4 | top1Δ    | + top1-T722A plasmid                            | a           | 1               | Terminal LOH                                                 |
|          |          |                                                 | a1          | 1               |                                                              |
|          |          |                                                 | b           | 5               | Gene Conversions                                             |
|          |          |                                                 | b2          | 1               |                                                              |
|          |          |                                                 | b3          | 4               |                                                              |
|          |          |                                                 | c           | 4               | Amplifications and Deletions at CUP1 locus (Chromosome VIII) |
|          |          |                                                 | c1          | 3               |                                                              |
|          |          |                                                 | c2          | 1               |                                                              |
|          |          |                                                 | e           | 2               | Amplifications and Deletions                                 |
|          |          |                                                 | e1          | 2               |                                                              |

Green, red and black represent heterozygosity for SNPs, homozygosity for W303-1A SNPs, and homozygosity for YJM789 SNPs, respectively.
